# Supplementary material for: “Polymer to polymer” recycling and body-temperature triggered shape memory of a carvone-based epoxy thermoset system achieved using a thiol-Michael covalent adaptable network
Source: Royal Society of Chemistry journal article supplement (doi:10.1039/d4ta03378g), 2024-01-01
Supplement: d4ta03378g1.pdf [file d4ta03378g1.pdf]

## Supplementary Information for

### **“Polymer to polymer” recycling and body-temperature triggered shape memory of carvone-based epoxy thermoset system achieved by thiol-Michael covalent adaptable network**

Beitao Liu<sup>a</sup>, Jiahui Li<sup>a</sup>, Cijian Zhang<sup>a</sup>, Yibo Wang<sup>a</sup>, Xigao Jian<sup>a\*</sup>, Zhihuan Weng<sup>a\*</sup>

<sup>a</sup>State Key Laboratory of Fine Chemicals, Frontiers Science Center for Smart Materials, Liaoning Technology Innovation Center of High Performance Resin Materials, Department of Polymer Science & Engineering, Dalian University of Technology, Dalian 116024

\*Corresponding author. Email: [zweng@dlut.edu.cn](mailto:zweng@dlut.edu.cn), [jian4616@dlut.edu.cn](mailto:jian4616@dlut.edu.cn)

#### **This Word file includes:**

Figs. S1 to S14

#### **Other Supplementary Materials for this manuscript include the following:**

Videos S1 to S6

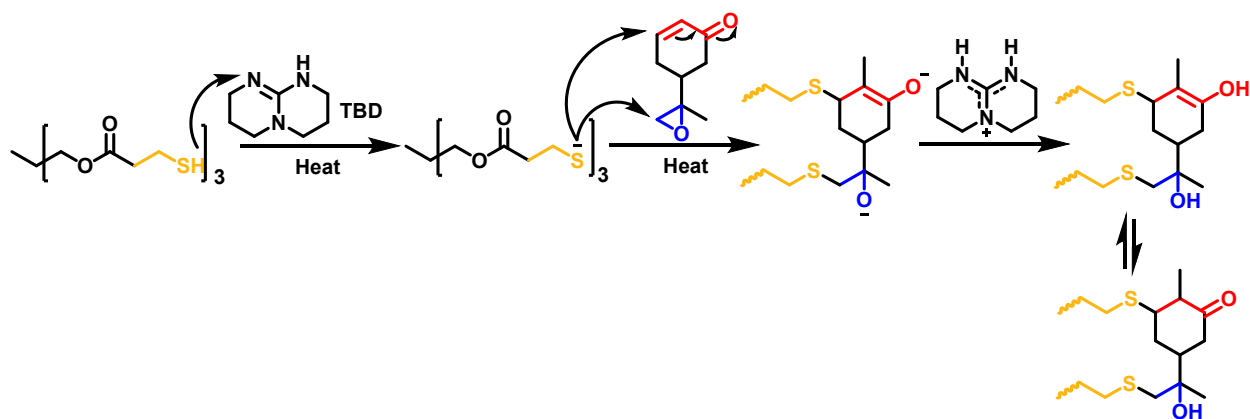

**Fig. S1** Curing mechanism of EPCA/TMPTMP.

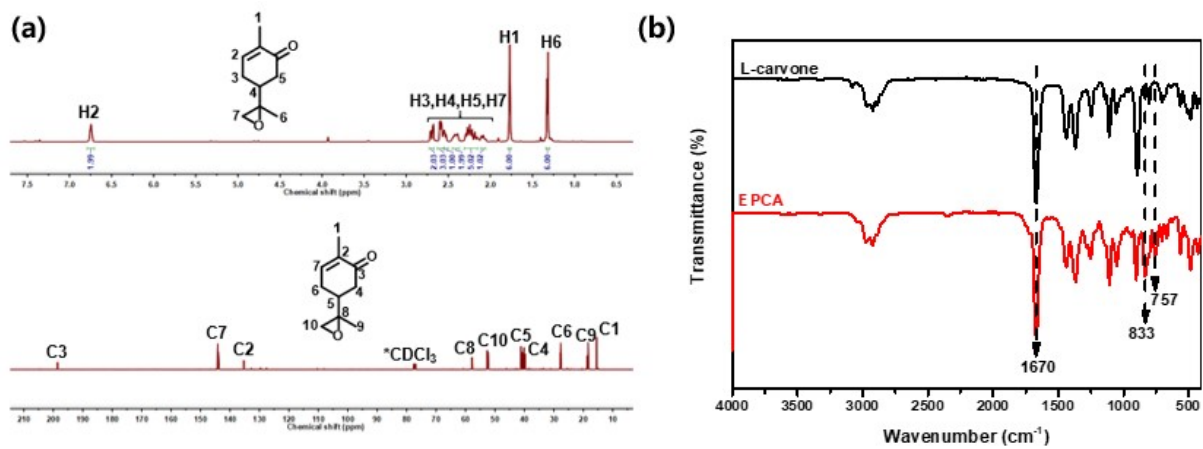

**Fig. S2** Structure characterization of EPCA. (a)  $^1\text{H}$  NMR and  $^{13}\text{C}$  NMR spectra of EPCA. (b) FT-IR spectra of EPCA.

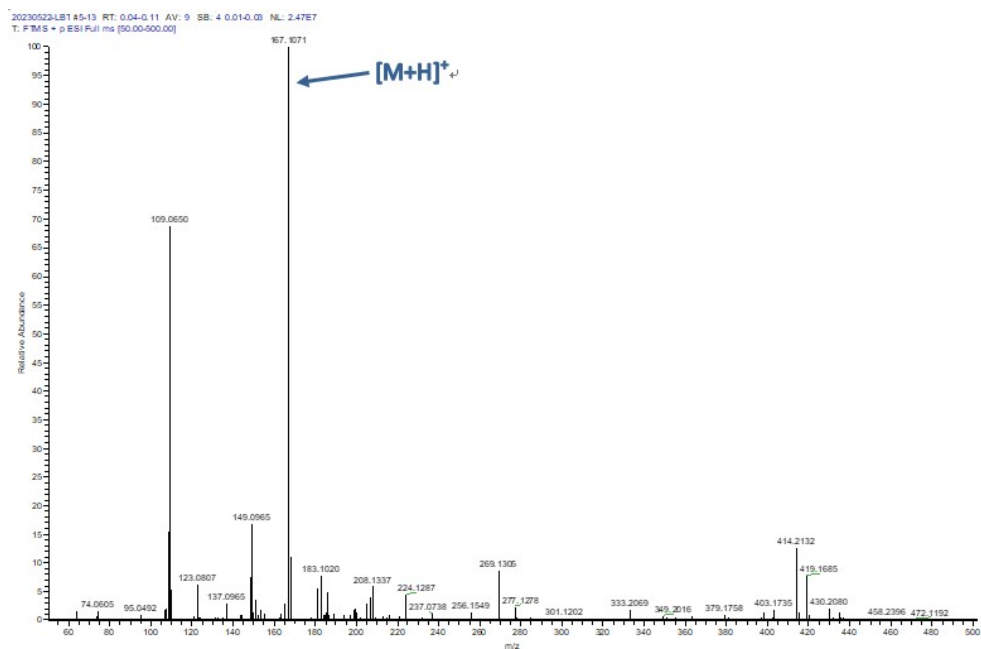

**Fig. S3** TOF-MS of EPCA.

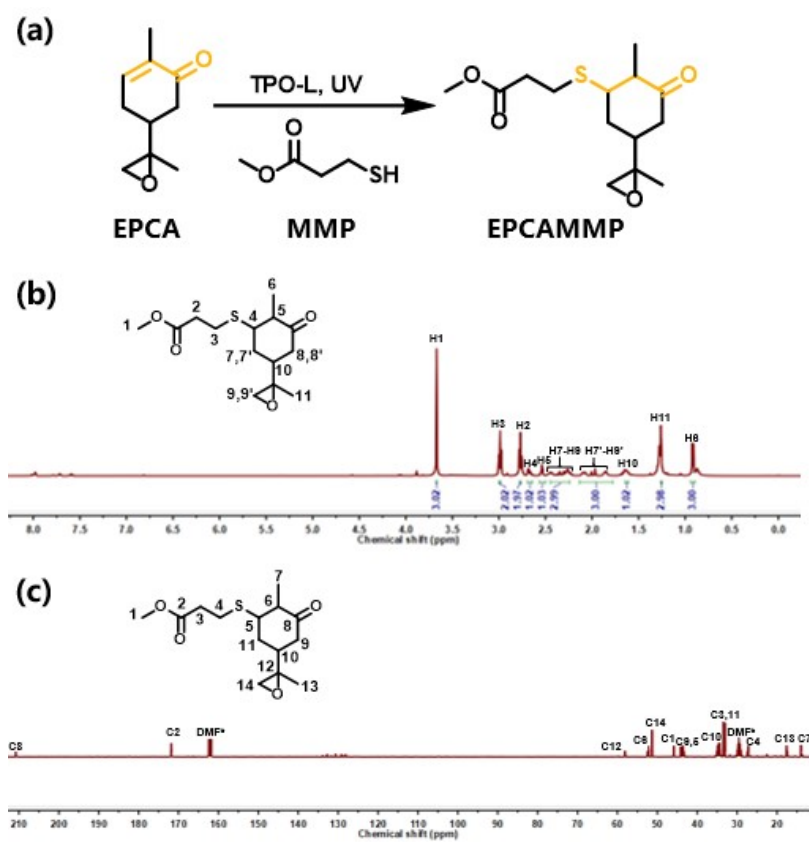

**Fig. S4** Structure characterization of EPCA/MMP. (a) Synthetic route of EPCA/MMP. (b)  $^1\text{H}$  NMR and (c)  $^{13}\text{C}$  NMR spectra of EPCA/MMP.

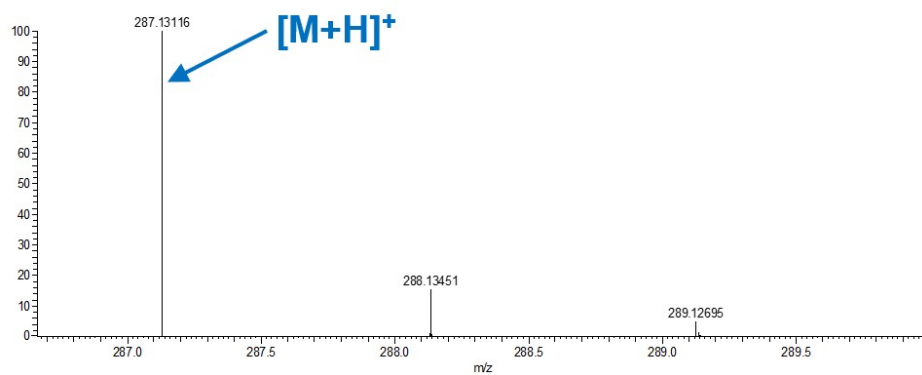

**Fig. S5** TOF-MS of EPCA/MMP.

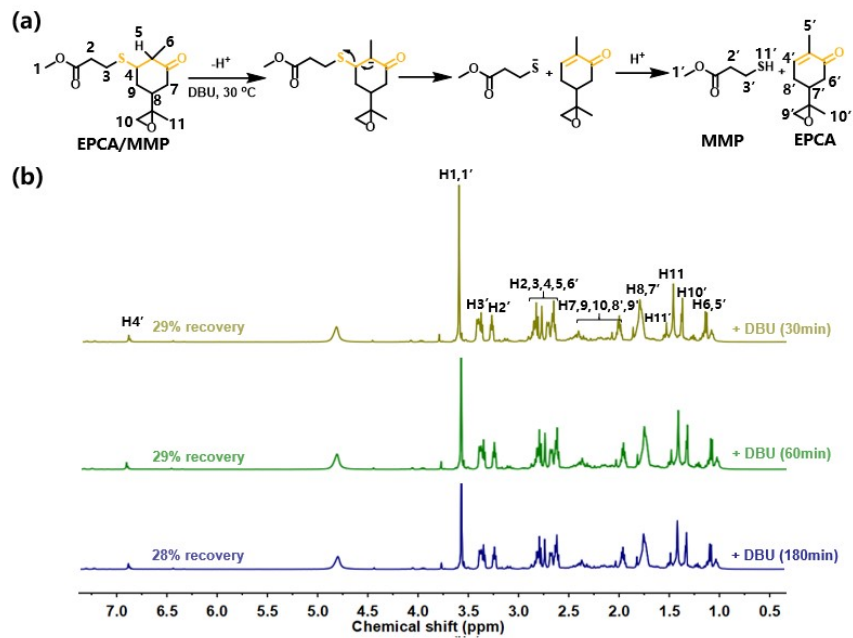

**Fig. S6** (a) The cleavage mechanism of thiol-Michael bonds under alkaline condition. (b)  $^1\text{H}$  NMR of degraded EPCA/MMP at 30 °C with DBU (5 wt%) at different reaction times.

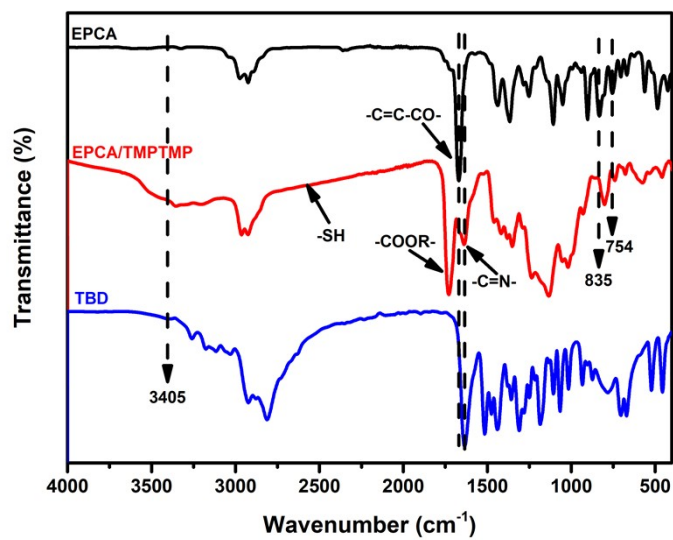

**Fig. S7** FT-IR spectra of EPCA, EPCA/TMPTMP and TBD.



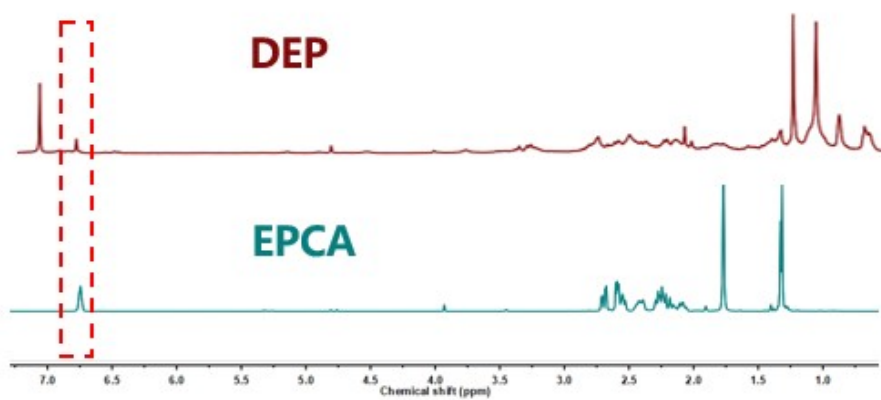

**Fig. S8** <sup>1</sup>H NMR spectra of DEP and EPCA.

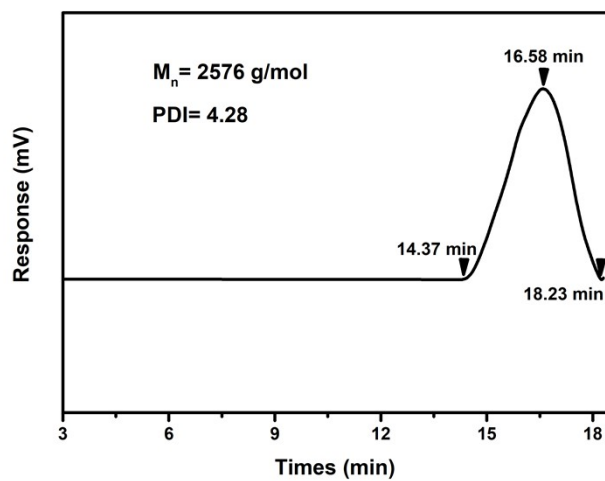

**Fig. S9** GPC chromatogram of DEP against polystyrene standards.

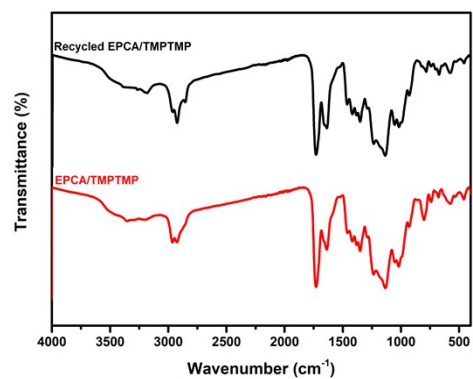

**Fig. S10** FT-IR spectra of EPCA/TMPTMP and recycled EPCA/TMPTMP.

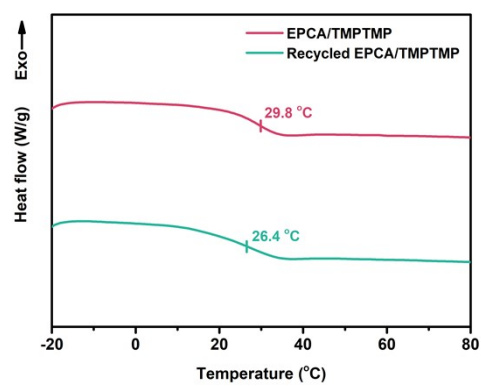

**Fig. S11** DSC curves of the pristine and recycled EPCA/TMPTMP.

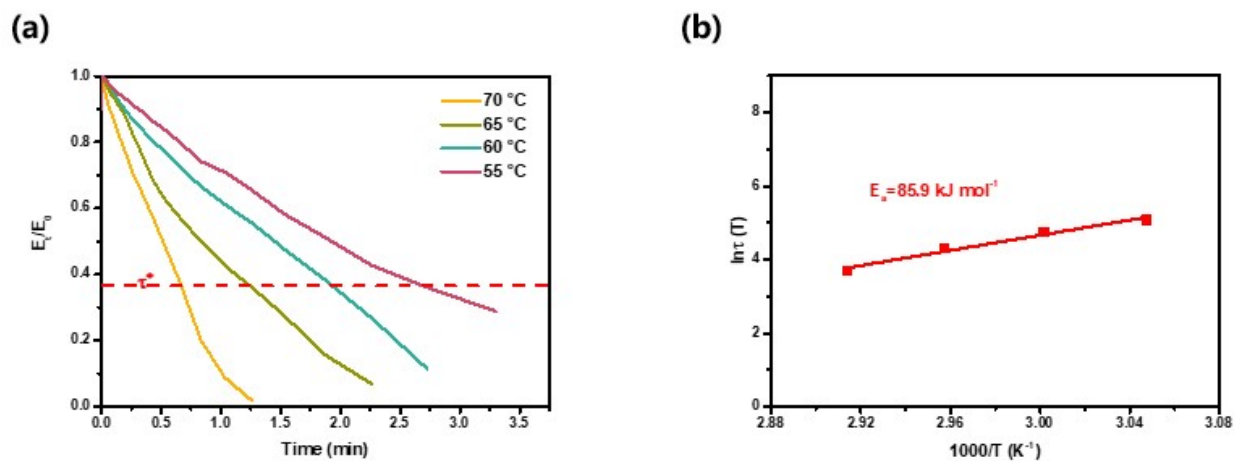

**Fig. S12** Dynamic property of EPCA/TMPTMP. (a) Normalized stress relaxation curves from 55 to 70 °C by DMA tension mode with the strain of 1%. (b) Linear fitting to calculate the relaxation activation energy ( $E_a$ ) of EPCA/TMPTMP via the Arrhenius equation.

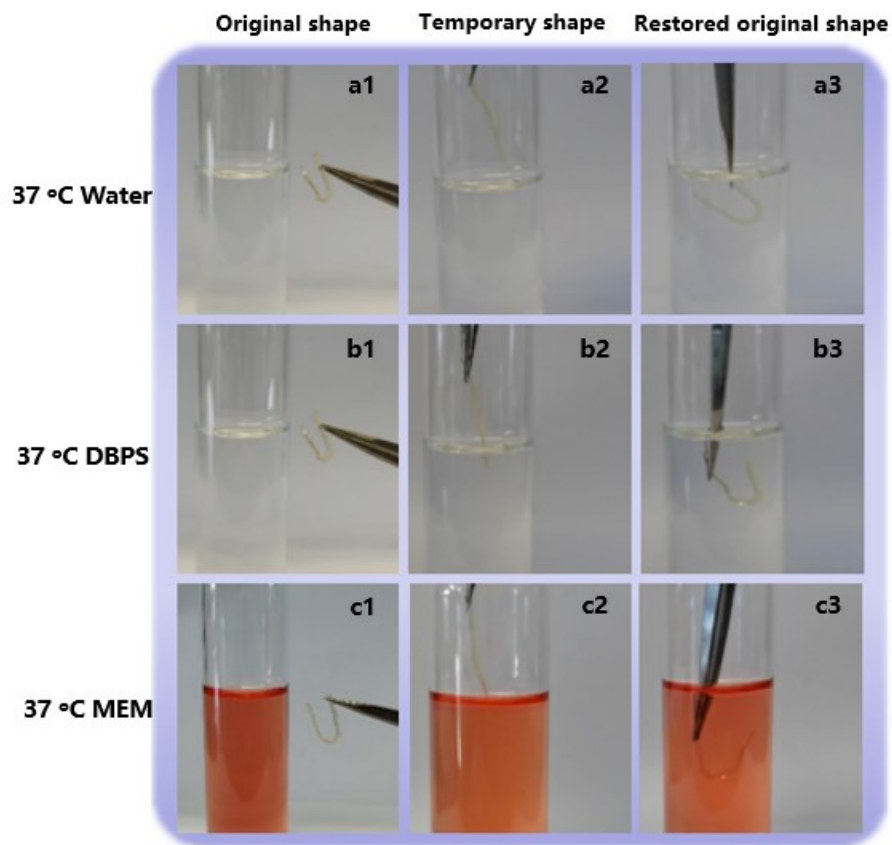

**Fig. S13** Photos showing the shape recovery process in (a1, a2, a3) 37 °C water, (b1, b2, b3) 37 °C DPBS, and (c1, c2, c3) 37 °C MEM. a1, b1 and c1 represent the original shape; a2, b2 and c2 represent the temporary shape; a3, b3 and c3 represent the restored original shape.

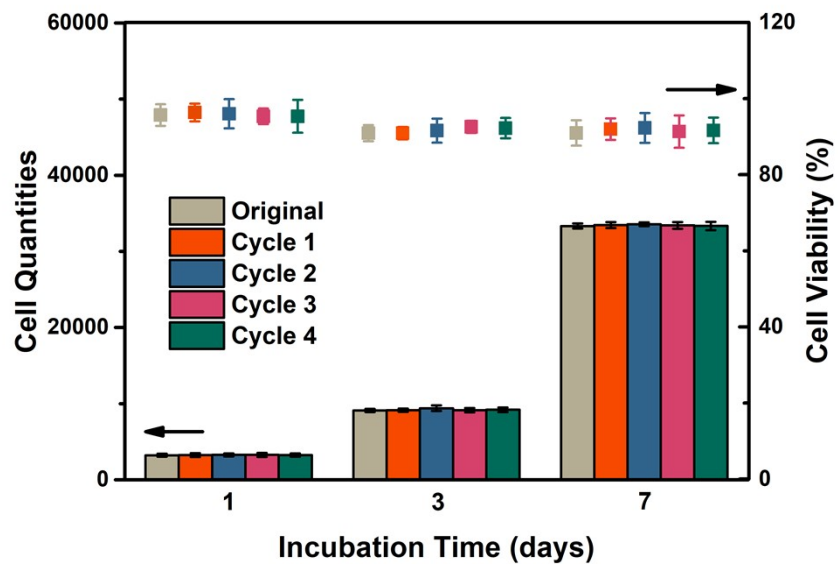

**Fig. S14** Cell proliferation and viability of MC3T3-E1 cells with (recycled) EPCA/TMPTMP for 1, 3 and 7 days.
